## Alzheimer Disease: DNA Fragmentation Indicates Increased Neuronal Vulnerability, but not Apoptosis

CHRISTINE STADELMANN, MD, WOLFGANG BRÜCK, MD, CHRISTIAN BANCHER, MD,  
KURT JELLINGER, MD, AND HANS LASSMANN, MD

**Abstract.** Although nerve cell loss is prominent in certain brain regions in Alzheimer disease (AD), it is currently unresolved how these cells die. Recent studies unanimously agree that there are more neurons displaying DNA fragmentation in AD compared with normal controls. However, controversy remains as to whether cell death is mediated by apoptosis or necrosis. We addressed this question by comparing AD lesions with those from cases with pontosubicular neuron necrosis (PSNN), a human pathological condition with unequivocal neuronal apoptosis, with regard to cell and nuclear morphology, immunohistochemistry, and *in situ* tailing. Immunohistochemistry was performed for an array of proteins with presumptive roles in the apoptotic process or the protection thereof, i.e. a recently described apoptosis-specific protein (ASP), the transcription factor c-Jun, Bcl-2, and various stress proteins: alpha B-Crystallin, heat shock protein (HSP) 27, HSP 65, HSP 70, HSP 90, and ubiquitin. Apoptotic neurons in PSNN displayed chromatin condensation, nuclear fragmentation, and cytoplasmic condensation. They were labeled with the *in situ* tailing technique and stained for the ASP. Despite the large numbers of cells with DNA fragmentation identified in the hippocampus of AD brains, only exceptional cells displayed the morphological characteristics of apoptosis or labeled for the ASP. We suggest that the increased rate of neuronal DNA fragmentation in AD patients indicates a higher susceptibility of the cells to metabolic disturbances compared with normal controls. The large number of cells with DNA fragmentation most likely reflects metabolic disturbances in the premortem period, and cell destruction is mediated through necrosis rather than apoptosis.

**Key Words:** Alzheimer disease; Apoptosis; Apoptosis-specific protein; c-Jun; DNA fragmentation; Neuronal cell death; Pontosubicular neuron necrosis.

### INTRODUCTION

Neuron loss exceeding 50% in certain brain areas is characteristic of the degenerative process in Alzheimer disease (AD) (1, 2). The extent of neuronal and synaptic loss correlates better with the severity of clinical disease than the hallmark neuropathological lesions, amyloid plaques, and neurofibrillary tangles (3, 4). Despite intense investigation, little is known about the mode and mechanisms of neuronal cell death in AD. An at least 2-fold increase in DNA strand breaks has been detected in AD whole brain tissue (5), and current histochemical techniques using a terminal deoxynucleotidyl transferase (TdT)-based incorporation of nucleotides at free 3-OH ends allow the detection of fragmented DNA at the single cell level (6, 7). Several investigators have reported quite unanimously on an increased incidence of cells with DNA fragmentation in AD and several other neurodegenerative diseases (8–16). This has been widely suggested as evidence for apoptotic cell death (8, 11–15).

Various lines of evidence point towards a role for apoptosis in the neurodegenerative process of AD (17, 18).

From the Institute of Neurology, University of Vienna, Vienna, Austria (CS, HL); the Department of Neuropathology, University of Göttingen, Göttingen, Germany (WB); the Department of Neurology, Lainz Hospital and Ludwig Boltzmann Institute for Clinical Neurobiology, Vienna, Austria (CB, KJ).

This work was supported by a grant from the Austrian Ministry for Science and Transport and by the EC concerted Action BMH4-CT96-0162.

Correspondence to: Prof Dr Hans Lassmann, Institute of Neurology, Schwarzschanerstrasse 17, A-1090 Vienna, Austria.

Familial AD-associated mutations of presenilin 1 and 2 sensitize transfected cells to various apoptosis-inducing stimuli, and mutants of amyloid precursor protein (APP) induce DNA fragmentation in neurons (19–23). Fetal cortical neurons from cases of Down syndrome apoptose rapidly in culture with a concomitant increase in reactive oxygen species and lipid peroxidation (24). Elevated levels of the death-promoting protein Bax have been described in human neurons in response to  $\beta$ A4 (25) *in vitro* and in AD neurons *in vivo* (26). The anti-apoptotic protein Bcl-2 has been reported to be upregulated in cells with DNA fragmentation and downregulated in tangle-bearing cells (27). C-Jun with a putative role in transcriptional regulation of apoptosis-associated genes (28–31) has been colocalized to AD neurons with DNA fragmentation (32). However, the term “apoptosis” clearly implies a well-defined cellular morphology, mainly chromatin condensation, nuclear fragmentation, and cytoplasmic condensation (33), whereas the majority of neurons in AD with DNA fragmentation lack clear morphological features of apoptosis (9, 10, 16).

Recently, Grand et al reported the detection of an apoptosis-specific protein (ASP) in various human and rat cell lines by means of a crossreacting antibody originally raised against an N-terminal (73–87) amino acid sequence of  $\nu$ -Jun (c-Jun/AP-1, Ab-2) (34). The predominant localization of the ASP in the cytoplasm, its relative insolubility, and its appearance rather late in the process of apoptosis suggest that it forms part of the modified cytoskeleton in apoptotic cells (34). We applied this

TABLE 1  
Specifications of Primary Antibodies Used for Immunohistochemistry

| Antigen                                | Antigen source/<br>specificity                | Antibody             | Clone    | Dilution | Pre-<br>treat-<br>ment | Source                                     |
|----------------------------------------|-----------------------------------------------|----------------------|----------|----------|------------------------|--------------------------------------------|
| Immediate early gene-encoded proteins: |                                               |                      |          |          |                        |                                            |
| c-Jun/AP-1                             | Residues 209–225<br>of v-Jun; C-ter-<br>minal | Rabbit PAB<br>(Ab-1) |          | 1:100    | MW                     | Oncogene, Cambridge,<br>Mass               |
| Apoptosis-related proteins:            |                                               |                      |          |          |                        |                                            |
| c-Jun/AP-1 (ASP)                       | Residues 73–87 of<br>v-Jun; N-terminal        | Rabbit PAB<br>(Ab-2) |          | 1:100    | MW                     | Oncogene                                   |
| Bcl-2                                  | Human Bcl-2, resi-<br>dues 41–54              | Mouse MAB            | 124      | 1:50     | MW                     | Dako, Glostrup, Denmark                    |
| Heat shock proteins:                   |                                               |                      |          |          |                        |                                            |
| Alpha B-crystallin                     | Purified 23K human<br>protein                 | Rabbit PAB           |          | 1:700    | None                   | Hans van Noort, Leiden,<br>The Netherlands |
| HSP 27                                 | Breast tumor cell<br>line                     | Mouse MAB            | G3.1     | 1:1000   | MW                     | Stressgen, Victoria, Can-<br>ada           |
| HSP 65                                 | Mycobacterium                                 | Mouse MAB            | ML30     | 1:100    | None                   | J. Ivanyi, London, UK                      |
| HSP 70                                 | HSC/HSP 70 from<br>HeLa cells                 | Mouse MAB            | C92F3A-5 | 1:200    | MW                     | Stressgen                                  |
| HSP 90                                 | HSP 90 from water<br>mold                     | Mouse MAB            | AC88     | 1:1000   | MW                     | Stressgen                                  |
| PHF/ubiquitin                          | Paired helical fila-<br>ments                 | Mouse MAB            | 3.39     | 1:20000  | None                   | See reference 39                           |
| Ubiquitin                              | Human ubiquitin                               | Mouse MAB            | FPM1     | 1:50     | MW                     | Novocastra, Newcastle<br>upon Tyne, UK     |

AP: activating protein; ASP: apoptosis-specific protein; PAB: polyclonal antibody; MAB: monoclonal antibody; MW: micro-wave; HSP: heat shock protein; HSC: heat shock cognate; PHF: paired helical filament.

marker for apoptosis in concert with antibodies against other apoptosis-associated antigens to search for evidence for neuronal apoptosis in AD. In parallel, we studied the expression of these antigens in pontosubicular neuron necrosis (PSNN), a brain disorder predominantly affecting premature infants and most likely caused by a combination of anoxia, hypercapnia, and hypoglycemia, which reveals abundant neuronal apoptosis in human autopsy tissue (35, 36).

## MATERIALS AND METHODS

### Tissue

Brain tissue from 12 cases with clinically diagnosed and neuropathologically confirmed AD, 10 age-matched controls, and 3 cases with PSNN was obtained at autopsy, fixed in buffered formalin, and routinely embedded in paraffin. All AD cases fulfilled the quantitative neuropathological criteria for the diagnosis of AD according to Khachaturian (37) and CERAD (38). For immunohistochemistry and in situ tailing, temporal lobe sections including temporal isocortex, hippocampus, and entorhinal cortex were used. In addition, we used midpontine sections of PSNN.

### Immunohistochemistry

We used primary antibodies against apoptosis-related antigens and heat shock proteins. Table 1 lists their characteristics

and the dilutions at which they were applied. Immunohistochemistry was performed as follows: deparaffinized sections were microwaved for 15 minutes (min) in citrate buffer (pH 6.0) and allowed to cool to room temperature. Anti-c-Jun/AP-1 (Ab-2), anti-alpha B-Crystallin, anti-paired helical filament/ubiquitin, and anti-Hsp 65 were also used without microwaving. Endogenous peroxidase was blocked by treatment with 0.2% H<sub>2</sub>O<sub>2</sub>-methanol followed by incubation with 10% fetal calf serum (FCS) in phosphate buffered saline (PBS) for 10 min. Primary antibodies were diluted as indicated in 10% FCS and permitted to bind overnight at 4°C. Sections without primary antibody were similarly processed to control for binding of the secondary antibody. Biotinylated anti-mouse or anti-rabbit antibodies (Amersham, Arlington Heights, Ill) were then applied at a dilution of 1:200 in 3% human serum for 1 hour (h) followed by Avidin-Peroxidase (Sigma, St. Louis, Mo) 1:100, also for 1 h at room temperature. We used 3-amino-9-ethylcarbazole (AEC, Sigma) as the chromogenic substrate. Alternatively, an alkaline phosphatase/anti-alkaline phosphatase system (Dako) employing Fast Red TR Salt (Sigma F1500) as chromogen was used for visualization of the primary antibodies. Sections were lightly counterstained with hematoxylin.

### Histochemical Detection of DNA Fragmentation (In Situ Tailing [IST])

Terminal deoxynucleotidyl transferase (TdT)-mediated incorporation of digoxigenin-labeled nucleotides was used to detect DNA fragmentation as described by Gold et al (7). Briefly,

deparaffinized sections were pretreated with 5% Proteinase K (Sigma) in PBS for 15 min at 37°C followed by incubation with TdT labeling mix (10  $\mu$ l 5 $\times$  tailing buffer, 1  $\mu$ l digoxigenin-labeled deoxynucleotides, 2  $\mu$ l cobalt chloride [25 mmol], 12 U terminal transferase, dH<sub>2</sub>O added to a total volume of 50  $\mu$ l) for 1 h at 37°C. Alkaline phosphatase-conjugated anti-digoxigenin Fab-fragments (1:500) were applied for 1 h; NBT/BCIP (4-nitrobluetetrazoliumchloride/5-bromo-4-chloro-3-indolylphosphate) was used for visualization of the complex (all reagents were purchased from Boehringer-Mannheim, Mannheim, Germany). This was followed by light hematoxylin counterstaining and coverslipping.

## RESULTS

### Morphology of Neurons with DNA Fragmentation in PSNN, AD, and Controls

In PSNN, apoptotic neurons were mainly present in the pons and in the dentate gyrus, CA 1, and subiculum regions of the hippocampus. In midpontine sections, a mean number of 106.3 ( $n = 2$ ) apoptotic neurons per square millimeter was observed predominantly in the ventral part of the pons. Criteria for apoptosis were a highly condensed and mostly fragmented nucleus, and a shrunken cell body with condensed cytoplasm (Fig. 1A). More than 80% of neuronal apoptotic nuclei were stained using the *in situ* tailing assay (Fig. 1B). Neurons not conforming to the apoptosis criteria were rarely labeled. No apoptotic cells other than neurons were present.

In AD, 30.3 cells/mm<sup>2</sup> in the CA 4 region (number of cases examined,  $n = 10$ ), 9.2 cells/mm<sup>2</sup> in the CA 1 region ( $n = 9$ ), and 13.4 cells/mm<sup>2</sup> in the subiculum and entorhinal cortex ( $n = 11$ ) were labeled for DNA fragmentation. Of these cells, an average of 32% in CA 4 could be identified as neurons based on morphological criteria, 25.6% in CA 1, and 38.1% in the subicular/entorhinal region. In general, labeled neurons revealed a loose and finely granular chromatin structure and did not show the above mentioned clear morphological criteria of apoptosis, i.e. chromatin condensation, margination of chromatin at the nuclear membrane, nuclear fragmentation, and cell shrinkage (Fig. 1H). However, exceptional labeled neurons displayed a reduction in cell size or clumping of chromatin, although a detailed analysis of nuclear structure was precluded by the intense labeling.

In contrast, in age matched controls, only 3.2 cells/mm<sup>2</sup> in CA 4 ( $n = 9$ ), 1.1 cells/mm<sup>2</sup> in CA 1 ( $n = 9$ ), and 0.7 cells/mm<sup>2</sup> in the subicular/entorhinal region ( $n = 8$ ) were positive for *in situ* tailing. On average, 4.4% of the labeled cell population in CA 4, 4.6% in CA 1, and 4.6% in subiculum/entorhinal cortex were neurons. No morphological alterations reminiscent of apoptosis could be detected in the set of cells labeled for DNA fragmentation.

### Detection of the Apoptosis-specific Protein in Apoptotic Neurons in PSNN, AD, and Controls

Performing immunohistochemistry for the recently reported "apoptosis-specific protein" (ASP), we observed a very high labeling efficiency for apoptotic neurons in PSNN. Morphometric analysis of pontine sections from 2 cases revealed labeling percentages for apoptotic neurons of 80.5% and 90.1%, respectively. Nonapoptotic neurons remained unstained (Fig. 1C).

In AD brains, neuronal labeling for the ASP was only very rarely detected. In a total of 12 AD brains, in which at least 3 hippocampal sections were screened for immunolabeling for ASP, only 2 strongly labeled neurons could be identified, one of them clearly displaying chromatin condensation at the nuclear membrane and cell body shrinkage, which are highly suggestive of an ongoing apoptotic process (Fig. 1I). In hippocampal sections of controls, no staining of neurons for the ASP was noted.

### Expression of Bcl-2 in PSNN, AD, and Controls

In PSNN, Bcl-2 expression was restricted to single, large neurons. It was absent in the ventral pontine nuclei, where the majority of apoptotic neurons were observed. In a hippocampal section of PSNN, mild Bcl-2 reactivity was found in layer II of the temporal cortex, but was completely absent in the dentate gyrus, subiculum, and CA 1 regions, which are prone to apoptosis in this disease.

In CA 1 and subicular/entorhinal regions, similar numbers of pyramidal neurons were labeled with equal intensity in AD and control brains. Leucocytes and ependymal cells were labeled in all cases of PSNN, AD, and controls (Fig. 1E), and the relative labeling intensity exceeded that observed in neurons. Both in AD and in age-matched controls, dentate gyrus and CA 4 neurons did not exhibit Bcl-2 immunoreactivity.

### Expression of c-Jun in PSNN, AD, and Controls

In PSNN, c-Jun expression was observed in nonapoptotic and occasionally in apoptotic neurons in the pontine nuclei and throughout the hippocampus (Fig. 1D). No association between c-Jun immunoreactivity and apoptotic activity of defined pontine areas could be established. Labeling was confined to the cytoplasm.

In AD and controls, pronounced c-Jun immunoreactivity was observed throughout the hippocampal subfields. Most neurons localized in the CA 4, CA 3, CA 2, and CA 1 subfields, the subicular/entorhinal region, and nearly all dentate gyrus neurons showed distinct labeling for c-Jun (Fig. 1G). No difference between AD and control tissue regarding localization, number of cells labeled, and intensity of immunostaining was noted. The observed staining pattern was also exclusively cytoplasmic.

TABLE 2  
Summary of Clinicopathological Data and Immunohistochemical Results

| Case  | Age                    | Sex | Cause of death               | PMT (h) | IST+ cells/mm <sup>2</sup> | Apoptotic cells/mm <sup>2</sup> | ASP (cells/mm <sup>2</sup> ) | Labeling of Hippocampal Neurons for |       |     |
|-------|------------------------|-----|------------------------------|---------|----------------------------|---------------------------------|------------------------------|-------------------------------------|-------|-----|
|       |                        |     |                              |         |                            |                                 |                              | Bcl-2                               | c-Jun |     |
| AD1   | 65                     | F   | Respiratory failure          | 34      | 24.1                       | 0                               | 0                            | -                                   | ±     | ±   |
| AD2   | 79                     | F   | Decubital ulcers             | 27      | 55.9                       | 0                               | 0                            | +++                                 | +++   | +++ |
| AD3   | 77                     | F   | n/a                          | 36      | 22.7                       | 0                               | 0                            | ++                                  | +++   | +++ |
| AD4   | 81                     | M   | Cardiac arrest               | 40      | 11.0                       | 0.07                            | 0.07                         | -                                   | +++   | +++ |
| AD5   | 70                     | F   | Decubital ulcers             | 37      | n/a                        | 0                               | 0                            | ++                                  | +++   | +++ |
| AD6   | 79                     | M   | Cardiopulmonary arrest       | 16      | 8.1                        | 0                               | 0                            | ±                                   | ±     | ±   |
| AD7   | 87                     | F   | Decubital ulcers             | 50      | 6.1                        | 0                               | 0                            | ±                                   | ±     | ±   |
| AD8   | 75                     | M   | Pneumonia                    | 45      | 14.3                       | 0                               | 0                            | -                                   | -     | -   |
| AD9   | 76                     | M   | Pneumonia                    | 28      | 11.4                       | 0                               | 0                            | +                                   | +++   | +++ |
| AD10  | 86                     | F   | Myocardial infarction        | 59      | 15.8                       | 0                               | 0                            | ++                                  | +++   | +++ |
| AD11  | 87                     | F   | n/a                          | 72      | 13.3                       | 0.06                            | 0.06                         | +                                   | +++   | +++ |
| AD12  | 60                     | F   | Sepsis                       | 10      | 10.3                       | 0                               | 0                            | +                                   | +++   | +++ |
| CO1   | 57                     | M   | Pneumonia                    | 34      | 2.4                        | 0                               | 0                            | ++                                  | +++   | +++ |
| CO2   | 58                     | F   | Sepsis                       | 27      | 1.5                        | 0                               | 0                            | ±                                   | n/a   | n/a |
| CO3   | 73                     | M   | Myocardial infarction        | 6       | 0.4                        | 0                               | 0                            | ±                                   | +++   | +++ |
| CO4   | 70                     | M   | Respiratory failure          | 44      | 1.5                        | 0                               | 0                            | +++                                 | +++   | +++ |
| CO5   | 75                     | M   | Wernicke's syndrome          | 16      | n/a                        | 0                               | 0                            | ++                                  | ±     | ±   |
| CO6   | 71                     | F   | Cardiac arrest               | 18      | 1.8                        | 0                               | 0                            | n/a                                 | +++   | +++ |
| CO7   | 65                     | M   | Cardiac arrest               | 6       | 2.4                        | 0                               | 0                            | ++                                  | +++   | +++ |
| CO8   | 84                     | M   | Cardiopulmonary arrest       | 10      | 0.8                        | 0                               | 0                            | ++                                  | +++   | +++ |
| CO9   | 77                     | M   | n/a                          | 11      | 0.0                        | 0                               | 0                            | ±                                   | n/a   | n/a |
| CO10  | 46                     | M   | Cardiopulmonary arrest       | 7       | 0.0                        | 0                               | 0                            | ++                                  | +++   | +++ |
| PSNN1 | 38th week of gestation | F   | Disturbed placental maturity | 24      | 98.6                       | 112                             | 118                          | ±                                   | ±     | ±   |
| PSNN2 | 39th week of gestation | F   | Placental infarction         | 24      | 68                         | 94                              | 94                           | n/a                                 | n/a   | +++ |
| PSNN3 | 1 month                | M   | Vitium cordis                | 24      | 25                         | 53.7                            | 21.5                         | -                                   | -     | +++ |

IST+ cells comprise neurons and glial cells. Regions analyzed for IST, ASP, Bcl-2, c-Jun, and apoptotic cells include CA 4, CA 3, CA 2, CA 1, subiculum, entorhinal cortex, and the adjacent temporal cortex. Results for PSNN1 and PSNN2 were obtained on pontine sections, PSNN3 analysis was performed on hippocampal sections. Semiquantitative scores represent subjective assessments of the numbers of labeled neurons, as follows: - : no neurons labeled; ±: few neurons labeled; +: up to 25% of neurons labeled; ++: 25-50% of neurons labeled; +++: over 50% of neurons labeled. Abbreviations used: PMT: postmortem time; h: hours; IST: in situ tailing; ASP: apoptosis specific protein; AD: Alzheimer disease patient; CO: control subject; F: female; M: male; n/a: data not available.

TABLE 3  
Summary of In situ Tailing and Immunohistochemical Results in PSNN, AD, and CO

| Method/antibody applied | PSNN              |                      | AD        | CO        |
|-------------------------|-------------------|----------------------|-----------|-----------|
|                         | Apoptotic neurons | Nonapoptotic neurons |           |           |
| In situ Tailing         | ++                | +                    | +         | ±         |
| Anti-ASP                | ++                | -                    | +/-       | -         |
| Anti-c-Jun              | +                 | ++                   | ++        | ++        |
| Anti-Bcl-2              | -                 | ±                    | ++        | ++        |
| Anti-alpha B-Crystallin | ±                 | +                    | ±         | ±         |
| Anti-HSP 27             | -                 | -                    | ±         | ±         |
| Anti-HSP 65             | ±                 | ++                   | ++        | ++        |
| Anti-HSP 70             | +                 | ++                   | ±         | ±         |
| Anti-HSP 90             | +                 | ++                   | ++        | ++        |
| Anti-PHF/Ubiquitin      | -                 | -                    | ++        | ±         |
|                         |                   |                      | (tangles) | (tangles) |
| Anti-Ubiquitin          | +                 | ++                   | ++        | ±         |
|                         |                   |                      | (tangles) | (tangles) |

Scores represent subjective assessments of numbers of labeled cells, as follows: -: no labeling observed; ±: exceptional cells labeled; +: few cells labeled; ++: many cells labeled. Anti-alpha B-Crystallin, anti-HSP 27, and anti-HSP 70 immunolabeled single chromatolytic cells. Only 2 apoptotic neurons were observed in sections of AD and none in controls. Abbreviations used: PSNN: patients with pontosubicular neuron necrosis; AD: Alzheimer disease patients; CO: control subjects; ASP: apoptosis specific protein; HSP: heat shock protein; PHF: paired helical filament.

#### Expression of Alpha B-Crystallin, HSP 27, HSP 65, HSP 70, HSP 90, Ubiquitin, and PHF/Ubiquitin in PSNN, AD, and Controls

Except for HSP 27 and PHF/ubiquitin, all heat shock proteins were detected in pontine neurons of PSNN. As with c-Jun, we were unable to localize HSP immunoreactivity to areas mainly affected by apoptotic neuronal cell death. Labeling efficiencies for apoptotic cells applying the various HSP antibodies were between 15% and 30%, similar to or below those for morphologically normal neurons (Fig. 1F).

In AD and controls, the typical granular mitochondrial staining pattern was observed in both neurons and glial cells with the antibody against HSP 65. Immunostaining for HSP 90 revealed a large proportion of neuronal cells, as well as astrocytes with pronounced depiction of neuronal processes. Expression of both proteins was not related to AD neuropathology, and similar staining patterns were observed in AD and controls. Neuronal immunostaining for alpha B-Crystallin and HSP 27 was restricted to a few ballooned, chromatolytic temporal cortex neurons in AD and controls, and no neuronal labeling was

found in the hippocampal subfields and entorhinal cortex. HSP 70 immunoreactivity also highlighted single chromatolytic temporal cortex neurons and additionally revealed multiple extracellular granular structures, especially in CA 4 and CA 1 regions in AD. Ubiquitin and PHF/ubiquitin immunoreactivity was predominantly found in AD neurofibrillary tangles and dystrophic neurites, with a few tangles detected in some controls (data not shown).

#### DISCUSSION

AD is a devastating neurodegenerative disorder that affects 15–25% of individuals in the steadily rising age group above 80. In recent years, it became increasingly clear that nerve cell loss and reduction in synaptic connectivity are the major neuropathological correlates of dementia (3, 4, 40). To conceive potential therapeutic targets, it is of major importance to clarify the mechanisms leading to nerve cell death (41).

Of the 2 main broad concepts of cell death, i.e. programmed cell death (apoptosis) and passive cell death (necrosis), apoptosis has recently gained much attention in AD research. This is mainly based on the discovery

→  
**Fig. 1.** A–F: Pontosubicular neuron necrosis. A: Multiple neurons displaying chromatin condensation, nuclear fragmentation, and cell body shrinkage typical of apoptosis; H&E staining. B: IST+ apoptotic neurons. C: Apoptotic neurons immunostained for the apoptosis-specific protein (ASP); A–C: ×925. D: Generalized cytoplasmic labeling of nonapoptotic neurons for c-Jun. E: Immunolocalization of Bcl-2 in a leucocyte; the apoptotic neuron remains unstained. F: Immunolabeling for HSP 70 detects few apoptotic cells; the majority remain unlabeled; D–F: ×760. G–H: Alzheimer disease: G: Generalized cytoplasmic immunoreactivity for c-Jun in CA 1 neurons; ×370. H: Representative IST+ cells in AD; morphologically normal nuclei exhibit labeling for DNA fragmentation. I: An exceptional AD neuron immunolabeled for the ASP and demonstrating condensation of chromatin at the nuclear membrane typical for cells undergoing apoptosis; temporal cortex; H–I: ×1180.

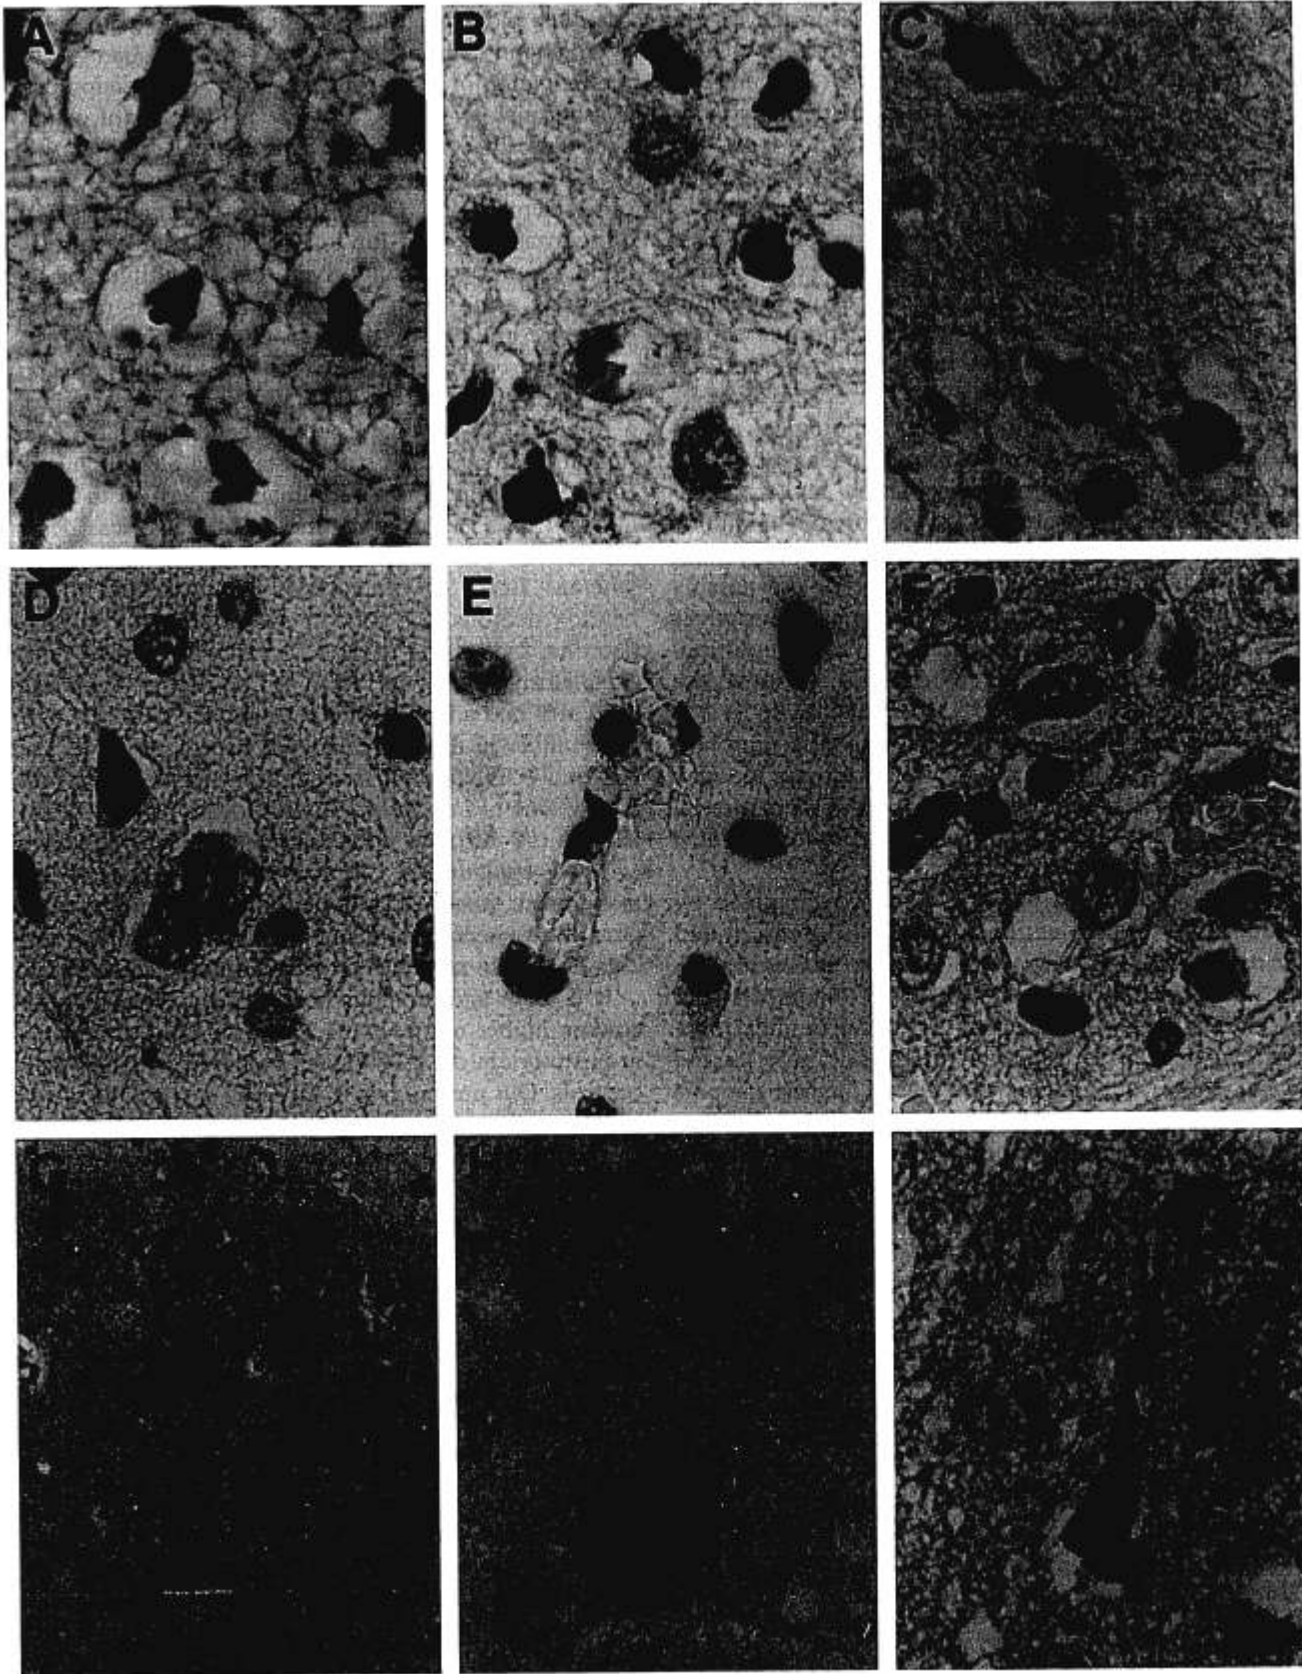

of AD-linked genes shown to be involved in the regulation of programmed cell death (19–23). Further evidence comes from the study of Down syndrome (24) and from the application of histochemical methods demonstrating DNA fragmentation in brain tissue (8–11, 13, 14, 16, 42). A deranged balance of pro- and antiapoptotic proteins reported in AD as well as other neurodegenerative diseases (25–27, 43) also supports a role for some form of programmed cell death. Recently, aberrant expression of cyclin-dependent kinases and other cell cycle regulators that may initiate apoptotic cell death by abortive activation of the cell cycle machinery has been reported in AD patients (44–47).

Apoptosis is strictly defined by morphological alterations in dying cells. Cytoplasmic condensation, cell shrinkage, and condensation, margination, and fragmentation of the chromatin are the key features of apoptotic cells as seen by light and electron microscopy (33). It has proven difficult to unequivocally identify the presumably small number of neurons in AD fulfilling the apoptosis criteria. Although proper assessment of nuclear fine structure may be hindered by the colorimetric substrate, the majority of cells labeled for DNA fragmentation in AD as well as in controls do not exhibit apoptotic morphology (9, 10, 16). We therefore sought an alternative way to investigate the contribution of apoptosis to neuronal cell death in AD neurons by examining apoptosis-related proteins.

Various studies claim that the protein recognized by the c-Jun/AP-1 (Ab-2) antibody is not the transcription factor c-Jun itself, but a protein found to be highly expressed in apoptotic cells; hence the term “apoptosis-specific protein” (34, 48). Our immunohistochemical data on glioblastoma, hippocampus from kainic acid treated rats, and acute inflammatory leukoencephalitis support this view (data not shown). The predominant localization of the ASP in the cytoplasm, its relative insolubility, and its appearance rather late in the process of apoptosis suggest that it may be a constituent of the modified cytoskeleton in apoptotic cells (34). However, its marked expression in apoptotic as opposed to necrotic cells and its strong association with cardinal features of apoptosis, namely cytoplasmic and chromatin condensation, make it an ideal marker for late-stage apoptosis. This property has recently been exploited in a study on the role of apoptosis in atherosclerosis (49). In our study, we detected 2 neurons stained for the ASP in a total of 36 hippocampal sections from AD patients, and no such staining was observed in controls. By contrast, apoptotic neurons in PSNN showed massive expression of the ASP.

C-Jun transcription factor is induced in response to various cellular stressors leading to degeneration and cell death as well as survival and regeneration. The eventual cell fate seems to depend on the specific homo- or heterodimerization of c-Jun with members of the Jun and Fos

families and various other transcription factors (30). In sympathetic neurons, c-Jun was shown to be essential for the induction of apoptosis, and its antagonization prevented neuronal death (28, 29). Elevated levels of c-Jun have been described in various neurological diseases, i.e. AD (32, 50, 51), amyotrophic lateral sclerosis (52), and multiple sclerosis (53). Our results show that similar numbers of neurons express c-Jun in PSNN, AD, and controls. This finding is not surprising given that a multitude of cellular reactions aside from the induction of programmed cell death are initiated by this transcription factor (30).

A disturbed balance between the antiapoptotic protein Bcl-2 and the proapoptotic Bax was hypothesized to play a role in  $\beta$ A4-mediated neurodegeneration (25). Various immunohistochemical studies reported an upregulation of Bcl-2 in AD brains, predominantly ascribed to extensive gliosis (54, 55). An upregulation of Bcl-2 was described associated with neuronal DNA fragmentation in AD, whereas Bcl-2 downregulation was detected in tangle-bearing neurons (27, 56). In our material, no differential neuronal expression of Bcl-2 in AD vs controls could be established. However, forming homo- or heterodimers with pro- and antiapoptotic proteins, the Bcl-2 family may well influence the propensity of neurons to cell death in AD and PSNN. Apart from Bcl-2, diverse stress proteins are capable of influencing the life-death balance in *in vitro* models (57–60). We were unable to detect a selective up- or downregulation of stress proteins in degenerating neurons in our material by immunohistochemistry, although quantitative techniques may be warranted to further elucidate the role of stress proteins in neurodegeneration.

It is now agreed that vulnerable brain regions in AD contain higher numbers of cells with DNA fragmentation in postmortem autopsy tissue compared with age-matched controls. Our present results strongly support the view that, with very few exceptions, these cells with DNA fragmentation do not die by apoptosis, as defined by morphological criteria and the expression of apoptosis-associated antigens. The consistent differences between AD patients and controls obtained in various independent studies (8–10, 13, 14, 16) make it unlikely that the DNA fragmentation observed is due to technical artifacts. Recently, postmortem times (PMTs) longer than 6.5 h were reported to increase the number of cells labeled for DNA fragmentation (32). We did not find such a correlation in our material in a previous study (9), and our findings are thus in accordance with many other reports (8, 11, 12, 15, 16, 61). We cannot formally exclude, however, that vulnerable AD neurons are more susceptible to longer PMTs, as suggested by some investigators (10, 32). We used the paradigm of PSNN to control for variables like PMT and fixation time to show that neurons can display the full spectrum of apoptotic changes including the expression of apoptosis-related proteins, and that these alterations can be readily detected in human autopsy tissue. The question thus arises



as to the role of neuronal DNA fragmentation in the pathogenesis of AD.

The cells labeled by *in situ* tailing could represent a population of neurons with *in vivo* DNA damage. Ongoing DNA repair processes or a general deficit of DNA repair can cause increased numbers of DNA strand breaks. Indeed, an accumulation of DNA damage has been described in AD patients before (5, 62–64). Morphological techniques for the evaluation of DNA fragmentation are, however, very insensitive, in general only label cells with massive and irreversible DNA damage, and cannot be expected to identify cells with deficits in DNA repair.

We therefore prefer the alternative explanation, namely that the cells with DNA fragmentation in AD are indeed dying cells, although not presenting with the classical features of apoptosis. Since their number, however, is too high for a disease with slow progression over many years, we assume that the final trigger for death in these cells mainly occurs during the terminal period of the patient's life (9). A synchronous induction and progression of cell death is supported by the morphological uniformity of the *in situ* tailing positive cells. This view implies that neurons in AD differ from those of controls in their susceptibility to death signals, which may result from an accumulation of DNA damage, as suggested previously (5, 62, 63), from as yet unknown metabolic disturbances (65–68), or from modifications in the intracellular control mechanisms of cell life and death. Minor additional noxious stimuli, such as preterminal hypoxia, or changes in the cellular microenvironment may be sufficient to kill these exquisitely vulnerable AD neurons.

#### ACKNOWLEDGMENTS

We are indebted to Helene Breitschopf, Elisabeth Gurnhofer, Angela Kury, and Marianne Leisser for expert technical assistance.

#### REFERENCES

- Gómez-Isla T, Hollister R, West H, et al. Neuronal loss correlates with but exceeds neurofibrillary tangles in Alzheimer's disease. *Ann Neurol* 1997;41:17–24
- Mann DMA, Yates PO, Marcyniuk B. Some morphometric observations on the cerebral cortex and hippocampus in presenile Alzheimer's disease, senile dementia of Alzheimer type and Down's syndrome in middle age. *J Neurol Sci* 1985;69:139–59
- De Kosky ST, Scheff SW. Synapse loss in frontal lobe biopsies in Alzheimer's disease: Correlation with cognitive severity. *Ann Neurol* 1990;27:457–64
- Terry RD, Masliah E, Salmon DP, et al. Physical basis of cognitive alterations in Alzheimer's disease: Synaptic loss is a major correlate of cognitive impairment. *Ann Neurol* 1991;30:572–80
- Mullaart E, Boerrigter METI, Ravid R, Swaab DF, Vijg J. Increased levels of DNA breaks in cerebral cortex of Alzheimer's disease patients. *Neurobiol Aging* 1990;11:169–73
- Gavrieli Y, Sherman Y, Ben-Sasson SA. Identification of programmed cell death *in situ* via specific labeling of nuclear DNA fragmentation. *J Cell Biol* 1992;119:493–501
- Gold R, Schmie M, Giegerich G, Breitschopf H, Hartung HP, Toyka K, Lassmann H. Differentiation between cellular apoptosis and necrosis by combined use of *in situ* tailing and nick translation techniques. *Lab Invest* 1994;71:219–25
- Dragunow M, Faul RL, Lawlor P, Beilharz EJ, Singleton K, Walker EB, Mee E. *In situ* evidence for DNA fragmentation in Huntington's disease striatum and Alzheimer's disease temporal lobes. *Neuroreport* 1995;6:1053–57
- Lassmann H, Bancher C, Breitschopf H, Wegiel J, Bobinski M, Jellinger K, Wisniewski HM. Cell death in Alzheimer's disease evaluated by DNA fragmentation *in situ*. *Acta Neuropathol* 1995;89:35–41
- Lucassen PJ, Chung WCJ, Kamphorst W, Swaab DF. DNA damage distribution in the human brain as shown by *in situ* end labeling: Area-specific differences in aging and Alzheimer's disease in the absence of apoptotic morphology. *J Neuropathol Exp Neurol* 1997;56:887–900
- Migheli A, Cavalla P, Marino S, Schiffer D. A study of apoptosis in normal and pathologic nervous tissue after *in situ* end-labeling of DNA strand breaks. *J Neuropathol Exp Neurol* 1994;53:606–16
- Portera-Cailliau C, Hedreen JC, Price DL, Koliatsos VE. Evidence for apoptotic cell death in Huntington disease and excitotoxic animal models. *J Neurosci* 1995;15:3775–87
- Smale G, Nichols NR, Brady DR, Finch CE, Horton Jr. WE. Evidence for apoptotic cell death in Alzheimer's disease. *Exp Neurol* 1995;133:225–30
- Su JH, Anderson AJ, Cummings BJ, Cotman CW. Immunohistochemical evidence for apoptosis in Alzheimer's disease. *Neuroreport* 1994;5:2529–33
- Tompkins MM, Basgall EJ, Zamrini E, Hill WD. Apoptotic-like changes in Lewy-body-associated disorders and normal aging in substantia nigral neurons. *Am J Pathol* 1997;150:119–31
- Troncoso JC, Sukhov RR, Kawas CH, Koliatsos VE. *In situ* labeling of dying cortical neurons in normal aging and in Alzheimer's disease: Correlations with senile plaques and disease progression. *J Neuropathol Exp Neurol* 1996;55:1134–42
- Bredesen DE. Neural apoptosis. *Ann Neurol* 1995;38:839–51
- Yankner BA. Mechanisms of neuronal degeneration in Alzheimer's disease. *Neuron* 1996;16:921–32
- Guo Q, Sopher BL, Furukawa K, Pham DG, Robinson N, Martin GM, Mattson MP. Alzheimer's presenilin mutation sensitizes neural cells to apoptosis induced by trophic factor withdrawal and amyloid  $\beta$ -peptide: Involvement of calcium and oxyradicals. *J Neurosci* 1997;17:4212–22
- Haass C. Presenilins: Genes for life and death. *Neuron* 1997;18:687–90
- Vito P, Lacanà E, D'Adamio L. Interfering with apoptosis:  $Ca^{2+}$ -binding protein ALG-2 and Alzheimer's disease gene ALG-3. *Science* 1996;271:521–54
- Wolozin B, Iwasaki K, Vito P, et al. Participation of presenilin 2 in apoptosis: Enhanced basal activity conferred by an Alzheimer mutation. *Science* 1996;274:1710–13
- Yamatsuji T, Matsui T, Okamoto T, et al. G-protein-mediated neuronal DNA fragmentation induced by familial Alzheimer's disease-associated mutants of APP. *Science* 1996;272:1349–52
- Busciglio J, Yankner BA. Apoptosis and increased generation of reactive oxygen species in Down's syndrome neurons *in vitro*. *Nature* 1995;378:776–79
- Paradis E, Douillard H, Koutroumanis M, Goodyer C, LeBlanc A. Amyloid  $\beta$  peptide of Alzheimer's disease downregulates Bcl-2 and upregulates Bax expression in human neurons. *J Neurosci* 1996;16:7533–39
- Su JH, Deng G, Cotman CW. Bax protein expression is increased in Alzheimer's brain: Correlations with DNA damage, bcl-2 expression, and brain pathology. *J Neuropathol Exp Neurol* 1997;56:86–93



27. Su JH, Satou T, Anderson AJ, Cotman CW. Up-regulation of Bcl-2 is associated with neuronal DNA damage in Alzheimer's disease. *Neuroreport* 1996;7:437-40
28. Estus S, Zaks WJ, Freeman RS, Gruda M, Bravo R, Johnson Jr EM. Altered gene expression in neurons during programmed cell death: Identification of *c-jun* as necessary for neuronal apoptosis. *J Cell Biol* 1994;127:1717-27
29. Ham J, Babij C, Whitfield J, Pharr CM, Lallemand D, Yaniv M. A *c-Jun* dominant negative mutant protects sympathetic neurons against programmed cell death. *Neuron* 1995;14:927-39
30. Herdegen T, Skene P, Bähr M. The *c-Jun* transcription factor—bipotential mediator of neuronal death, survival and regeneration. *Trends Neurosci* 1997;20:227-31
31. Morgan JJ, Curran T. Stimulus-transcription coupling in the nervous system: Involvement of the inducible proto-oncogenes *fos* and *jun*. *Ann Rev Neurosci* 1991;14:421-51
32. Anderson AJ, Su JH, Cotman CW. DNA damage and apoptosis in Alzheimer's disease: Colocalization with *c-Jun* immunoreactivity, relationship to brain area, and effect of postmortem delay. *J Neurosci* 1996;16:1710-19
33. Wyllie AH, Kerr JFR, Currie AR. Cell death: The significance of apoptosis. *Int Rev Cytol* 1980;68:251-306
34. Grand RJ, Milner AE, Mustoe T, Johnson GD, Owen D, Grant ML, Gregory CD. A novel protein expressed in mammalian cells undergoing apoptosis. *Exp Cell Res* 1995;218:439-51
35. Brück Y, Brück W, Kretschmar HA, Lassmann H. Evidence for neuronal apoptosis in pontosubicular neuron necrosis. *Neuropathol Appl Neurobiol* 1996;22:23-29
36. Friede RL. Ponto-subicular lesions in perinatal anoxia. *Arch Pathol* 1972;94:343-54
37. Khachaturian ZS. Diagnosis of Alzheimer's disease. *Arch Neurol* 1985;42:1097-1105
38. Mirra SS, Heyman A, McKeel D, et al. The consortium to establish a registry for Alzheimer's disease (CERAD). Part II. Standardization of the neuropathological assessment of Alzheimer's disease. *Neurology* 1991;41:479-86
39. Wang GP, Grundke-Iqbal I, Kasak RJ, Iqbal K, Wisniewski HM. Alzheimer neurofibrillary tangles: Monoclonal antibodies to inherent antigen(s). *Acta Neuropathol* 1984;62:268-75
40. Lassmann H. Patterns of synaptic and nerve cell pathology in Alzheimer's disease. *Behav Brain Res* 1996;78:9-14
41. Selkoe DJ. Alzheimer's disease: Genotypes, phenotype, and treatments. *Science* 1997;275:630-31
42. Cotman CW, Su JH. Mechanisms of neuronal cell death in Alzheimer's disease. *Brain Pathol* 1996;6:493-506
43. Mu X, He J, Anderson DW, Trojanowski JQ, Springer JE. Altered expression of *bcl-2* and *bax* mRNA in amyotrophic lateral sclerosis spinal cord motor neurons. *Ann Neurol* 1996;40:379-86
44. McShea A, Harris PLR, Webster KR, Wahl AF, Smith MA. Abnormal expression of the cell cycle regulators P16 and CDK4 in Alzheimer's disease. *Am J Pathol* 1997;150:1933-39
45. Nagy Zs, Esiri MM, Cato A-M, Smith AD. Cell cycle markers in the hippocampus in Alzheimer's disease. *Acta Neuropathol* 1997;94:6-15
46. Ross ME. Cell division and the nervous system: Regulating the cycle from neural differentiation to death. *Trends Neurosci* 1996;19:62-68
47. Vincent I, Jicha G, Rosado M, Dickson DW. Aberrant expression of mitotic *cdc2/cyclin B1* kinase in degenerating neurons of Alzheimer's disease brain. *J Neurosci* 1997;17:3588-98
48. Harlan RE, Garcia MM. Charting of Jun family member proteins in the rat forebrain and midbrain: Immunocytochemical evidence for a new Jun-related antigen. *Brain Res* 1995;692:1-22
49. Björkerud S, Björkerud B. Apoptosis is abundant in human atherosclerotic lesions, especially in inflammatory cells (macrophages and T cells), and may contribute to the accumulation of gruel and plaque instability. *Am J Pathol* 1996;149:367-80
50. Anderson AJ, Cummings BJ, Cotman CW. Increased immunoreactivity for Jun- and Fos-related proteins in Alzheimer's disease: Association with pathology. *Exp Neurol* 1994;125:286-95
51. Ferrer I, Seguf J, Planas AM. Amyloid deposition is associated with *c-Jun* expression in Alzheimer's disease and amyloid angiopathy. *Neuropathol Appl Neurobiol* 1996;22:521-26
52. Virgo L, de Bellerocche J. Induction of the immediate early gene *c-jun* in human spinal cord in amyotrophic lateral sclerosis with concomitant loss of NMDA receptor NR-1 and glycine transporter mRNA. *Brain Res* 1995;676:196-204
53. Martín G, Seguf J, Dfaz-Villoslada P, Montalbán X, Planas AM, Ferrer I. Jun expression is found in neurons located in the vicinity of subacute plaques in patients with multiple sclerosis. *Neurosci Lett* 1996;212:95-98
54. Migheli A, Cavalla P, Piva R, Giordana MT, Schiffer D. Bcl-2 protein expression in aged brain and neurodegenerative diseases. *Neuroreport* 1994;5:1906-8
55. O'Barr S, Schultz J, Rogers J. Expression of the protooncogene *bcl-2* in Alzheimer's disease brain. *Neurobiol Aging* 1995;17:131-36
56. Satou T, Cummings BJ, Cotman CW. Immunoreactivity for Bcl-2 protein within neurons in the Alzheimer's disease brain increases with disease severity. *Brain Res* 1995;697:35-43
57. Mailhos C, Howard MK, Latchman DS. Heat shock protects neuronal cells from programmed cell death by apoptosis. *Neuroscience* 1993;55:621-27
58. Mehlen P, Schulze-Osthoff K, Arrigo A-P. Small stress proteins as novel regulators of apoptosis. *J Biol Chem* 1996;271:16510-14
59. Polla BS, Kantengwa S, Francois D, Salvioli S, Franceschi C, Marsac C, Cossarizza A. Mitochondria are selective targets for the protective effects of heat shock against oxidative injury. *Proc Natl Acad Sci USA* 1996;93:6458-63
60. Samali A, Cotter TC. Heat shock proteins increase resistance to apoptosis. *Exp Cell Research* 1996;223:163-70
61. Petit CK, Roberts B. Effect of postmortem interval on *in situ* end-labeling of DNA oligonucleosomes. *J Neuropathol Exp Neurol* 1995;54:761-65
62. Robbins JH, Otsuka F, Tarone RD, et al. Radiosensitivity in Alzheimer's disease and Parkinson disease [letter]. *Lancet* 1983;1:468-69
63. Robison SH, Munzer JS, Tandan R, Bradley WG. Alzheimer's disease cells exhibit defective repair of alkylating agent-induced DNA damage. *Ann Neurol* 1987;21:250-58
64. Parshad R, Sanford KK, Price FM, et al. Fluorescent light-induced chromatid breaks distinguish Alzheimer disease cells from normal cells in tissue culture. *Proc Natl Acad Sci USA* 1996;93:5146-50
65. Ankarcróna M, Dypbukt JM, Bonfoco E, Zhivotovsky B, Orrenius S, Lipton SA, Nicotera P. Glutamate-induced neuronal death: A succession of necrosis or apoptosis depending on mitochondrial function. *Neuron* 1995;15:961-73
66. Beal MF. Aging, energy, and oxidative stress in neurodegenerative diseases. *Ann Neurol* 1995;38:357-66
67. Hoyer S. Oxidative metabolism deficiencies in brains of patients with Alzheimer's disease. *Acta Neurol Scand Suppl* 1996;165:18-24
68. Sheehan JP, Swerdlow RH, Miller SW, Davis RE, Parks JK, Parker WD, Tuttle JB. Calcium homeostasis and reactive oxygen species production in cells transformed by mitochondria from individuals with sporadic Alzheimer's disease. *J Neurosci* 1997;17:4612-22

Received September 29, 1997

Revision received December 23, 1997

Accepted January 2, 1998
